# Supplementary material for: Loss of EGR-1 uncouples compensatory responses of pancreatic β cells
Source: PubMed Central journal article supplement (PMC7086362; doi:10.7150/thno.40664), 2020-03-04
Supplement: thnov10p4233s1.pdf [file thnov10p4233s1.pdf]

Figure S1

A

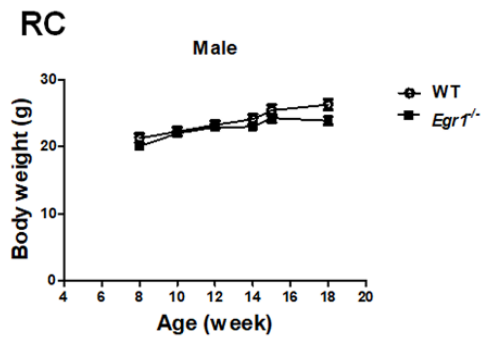

B

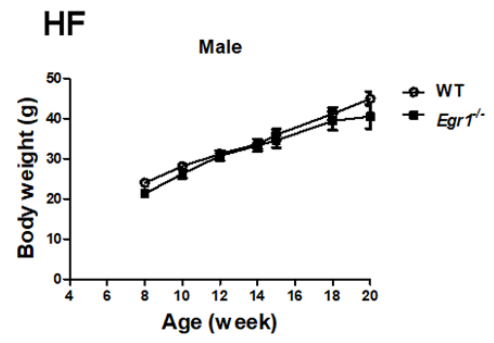

Figure S1. The body weights of 2-month-old male mice fed (A) RC and (B) a HF diet for 3 months. WT RC,  $n=3$ ; *Egr1*<sup>-/-</sup> RC,  $n=4$ ; WT HF,  $n=6$ ; *Egr1*<sup>-/-</sup> HF,  $n=11$ .

Figure S2

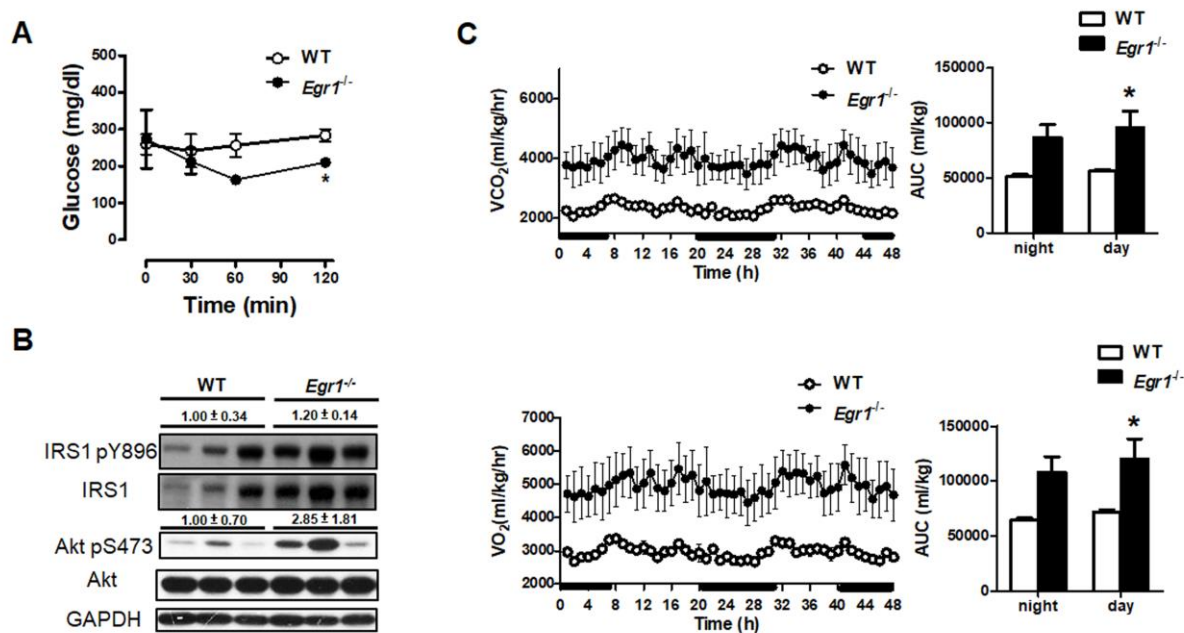

Figure S2. *Egr1*<sup>-/-</sup> mice are protected from diet-induced insulin resistance. **A**: Plasma glucose levels during insulin tolerance test in 5-month-old male mice fed a HF diet for 3 months. WT, n=5; *Egr1*<sup>-/-</sup>, n=3. \**P*<0.05 compared to WT. **B**: Immunoblot analyses on phosphorylation at Tyr896 of IRS1 and Ser473 of Akt in the liver of 5-month-old male mice fed a HF diet for 3 months. Each band represents a tissue extract from a single mouse. The intensities of the bands, quantified densitometrically relative to WT, are shown. \**P*<0.05, \*\**P*<0.01 and \*\*\**P*<0.001 for *Egr1*<sup>-/-</sup> mice compared with WT mice. **C**: Oxygen consumption (VO<sub>2</sub>; upper panels) and carbon dioxide production (VCO<sub>2</sub>; lower panels) and their mean AUC of HF-fed male mice in indirect calorimetry over 48 h (n=3 in each group). Bold bars on the x-axes represent the dark phases.

Figure S3

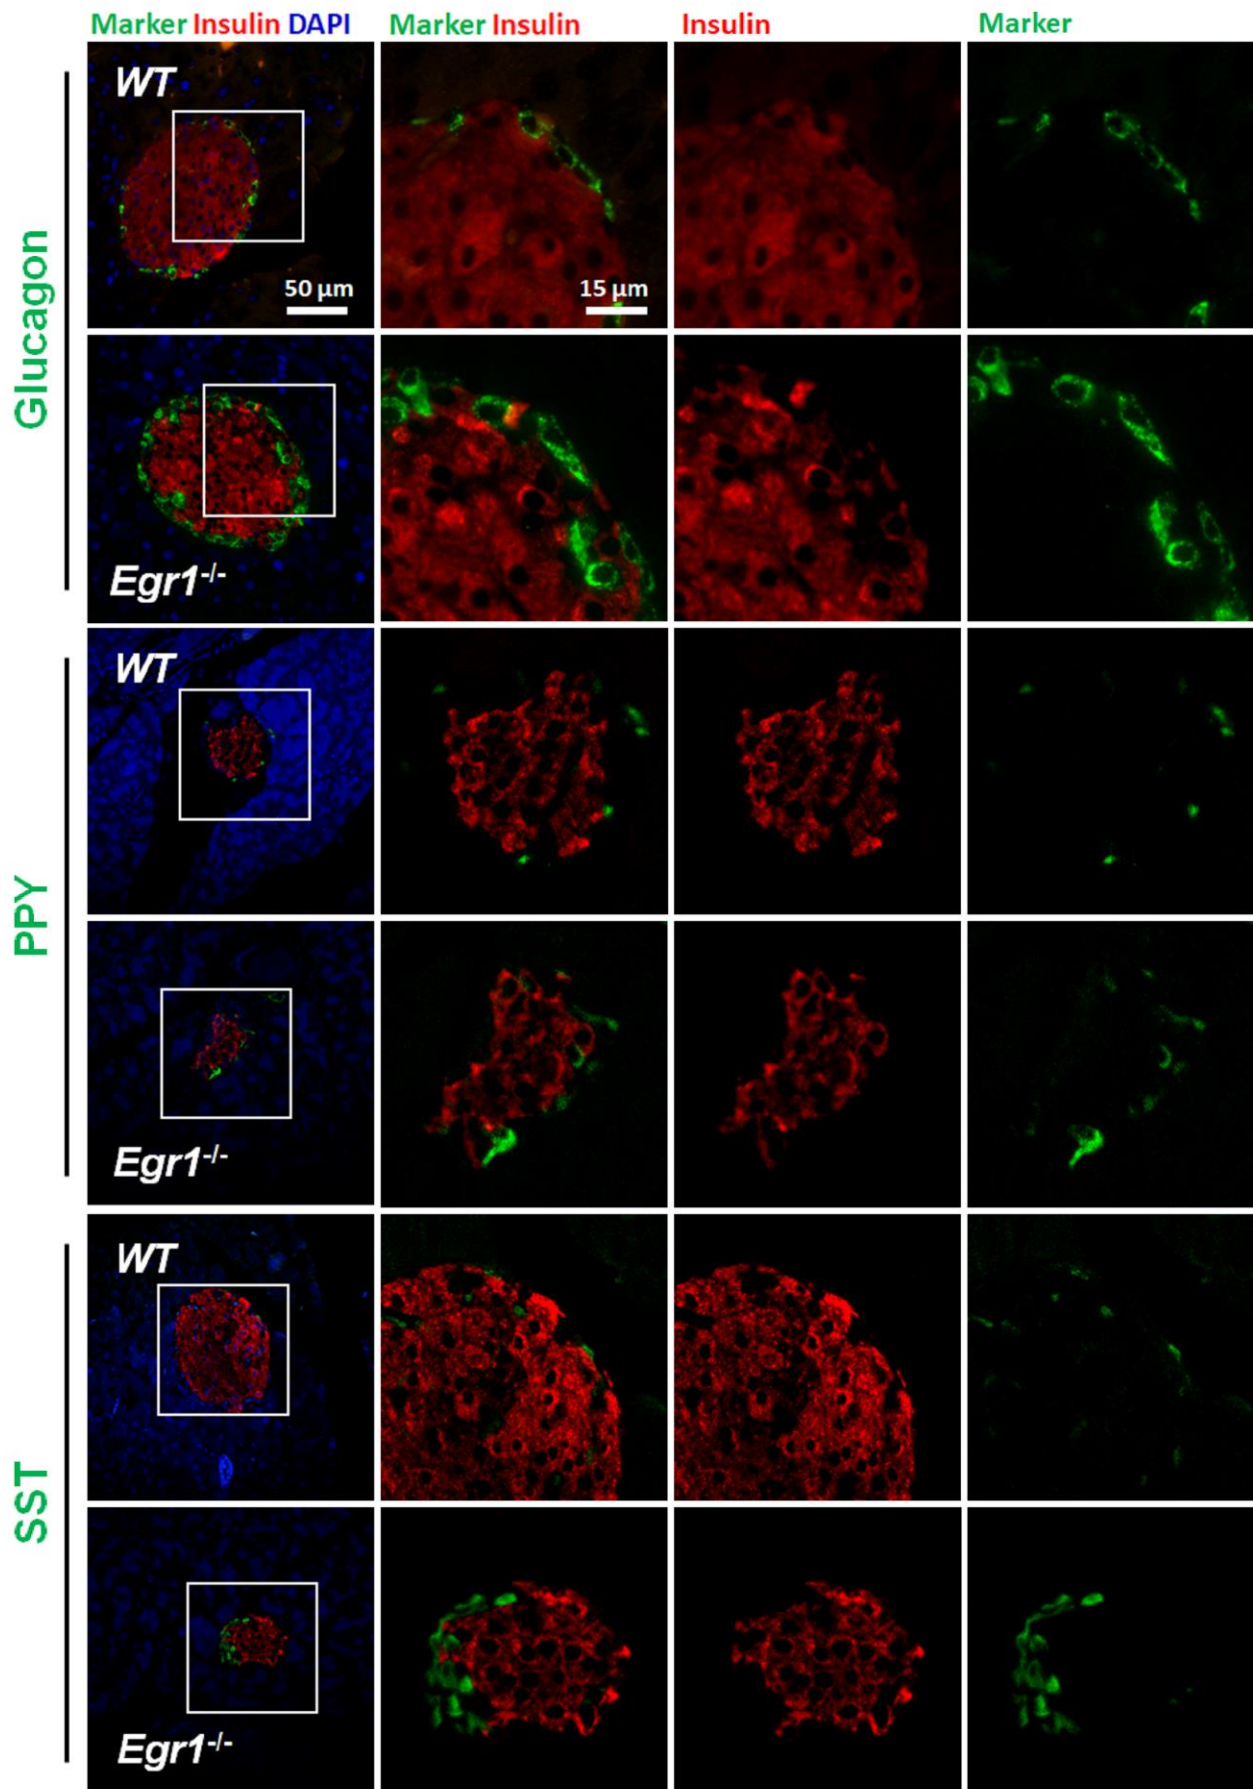

Figure S3. Loss of  $\beta$ -cell identity in the islets of RC-fed *Egr1*<sup>-/-</sup> mice. Confocal images of co-staining for the markers of  $\beta$ -cell (insulin) in *red* with  $\alpha$ -cell (glucagon), PP-cell (pancreatic polypeptide, PPY), or  $\delta$ -cell (somatostatin, SST) in *green* in the pancreas of 5-month-old RC-fed mice. The enlarged images highlight the representative co-localization with 3 $\times$  magnification from white squares in the overlay images.

Figure S4

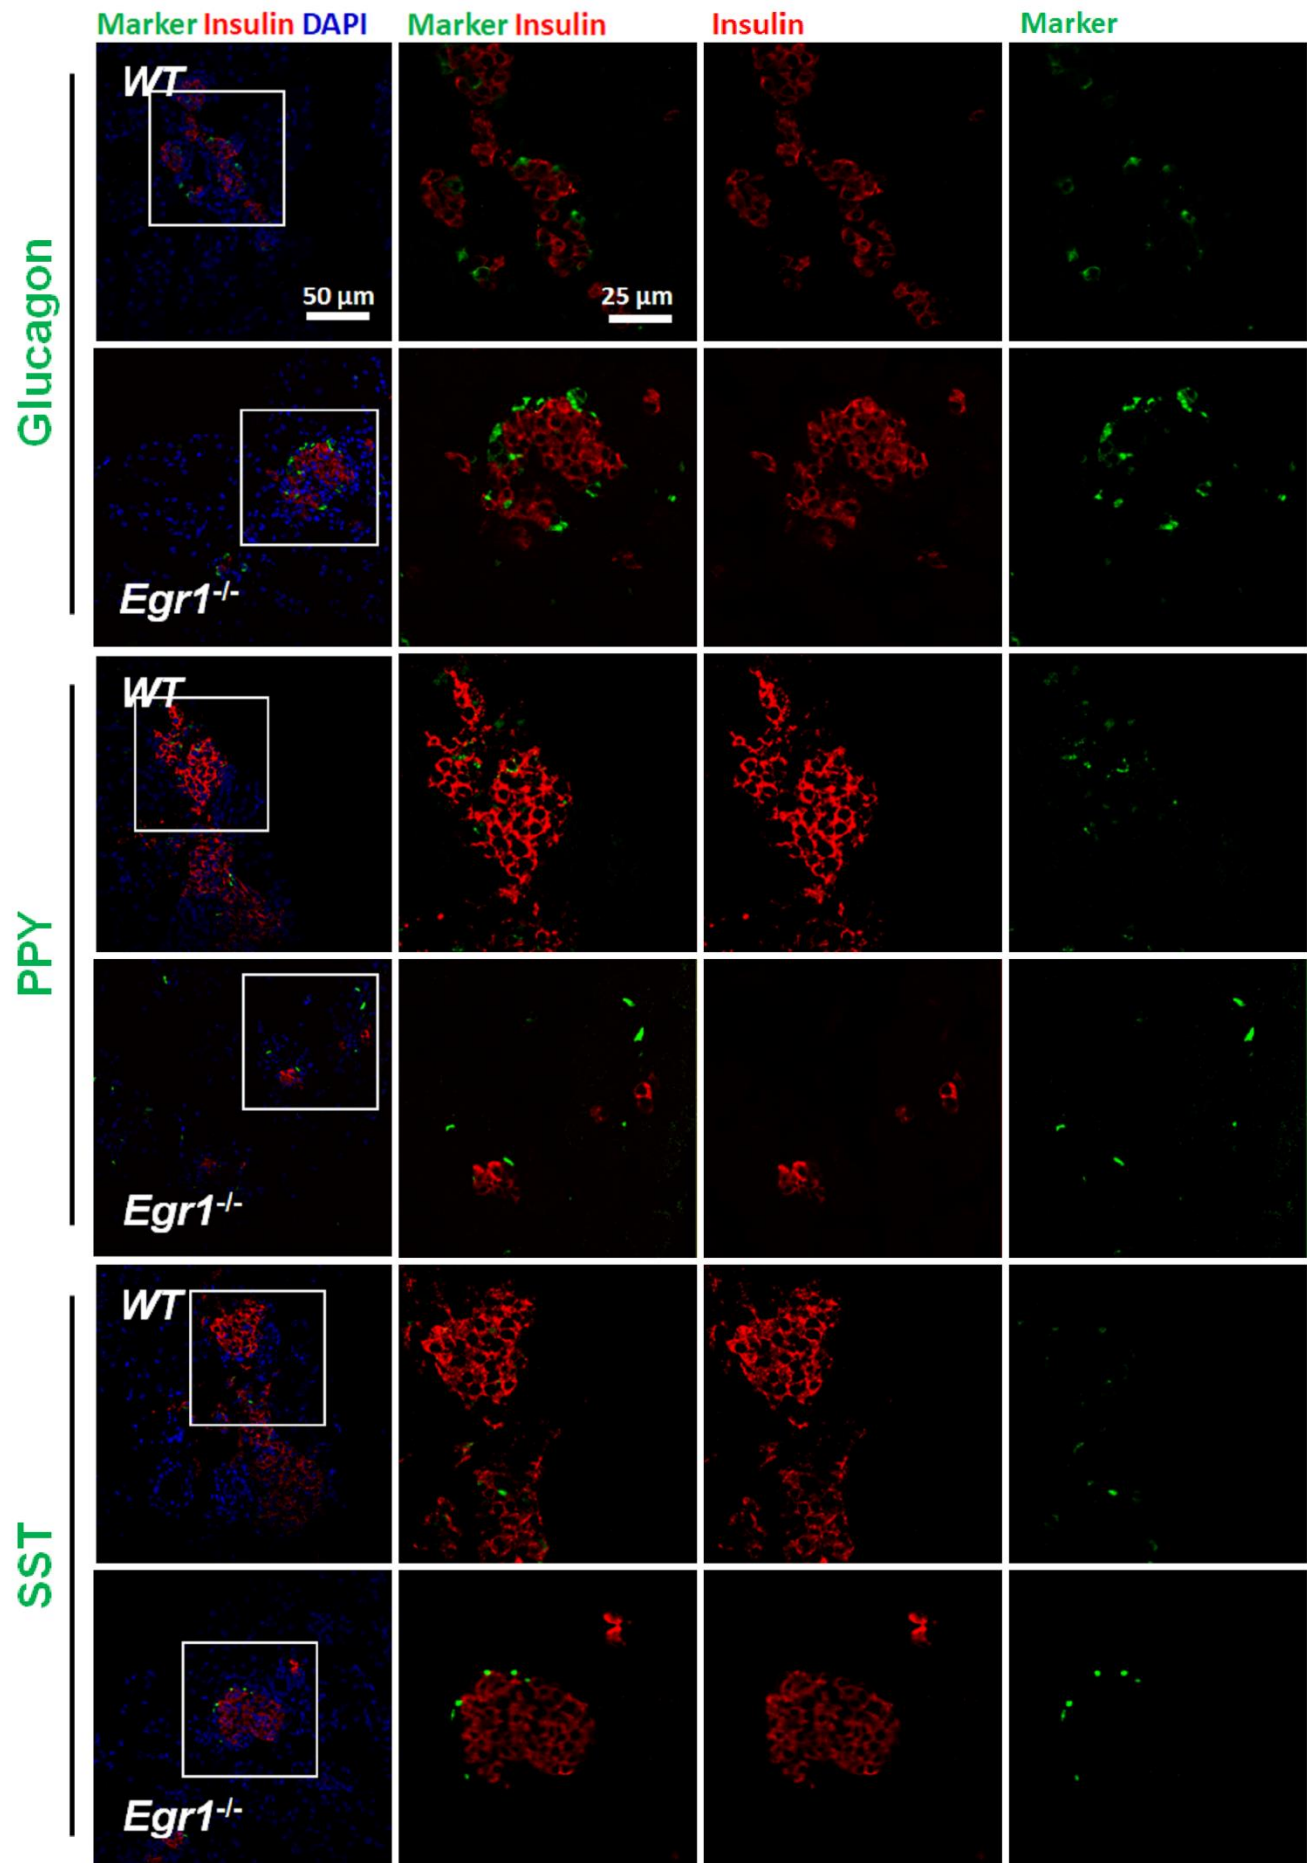

Figure S4. Loss of  $\beta$ -cell identity in the islets of neonatal *Egr1*<sup>-/-</sup> mice. Confocal images of co-staining for the markers of  $\beta$ -cell (insulin) in *red* with  $\alpha$ -cell (glucagon), PP-cell (pancreatic polypeptide, PPY), or  $\delta$ -cell (somatostatin, SST) in *green* in the pancreas of postpartum day 1 (P1) neonatal mice. The enlarged images highlight the representative co-localization with 2 $\times$  magnification from white squares in the overlay images.

Figure S5

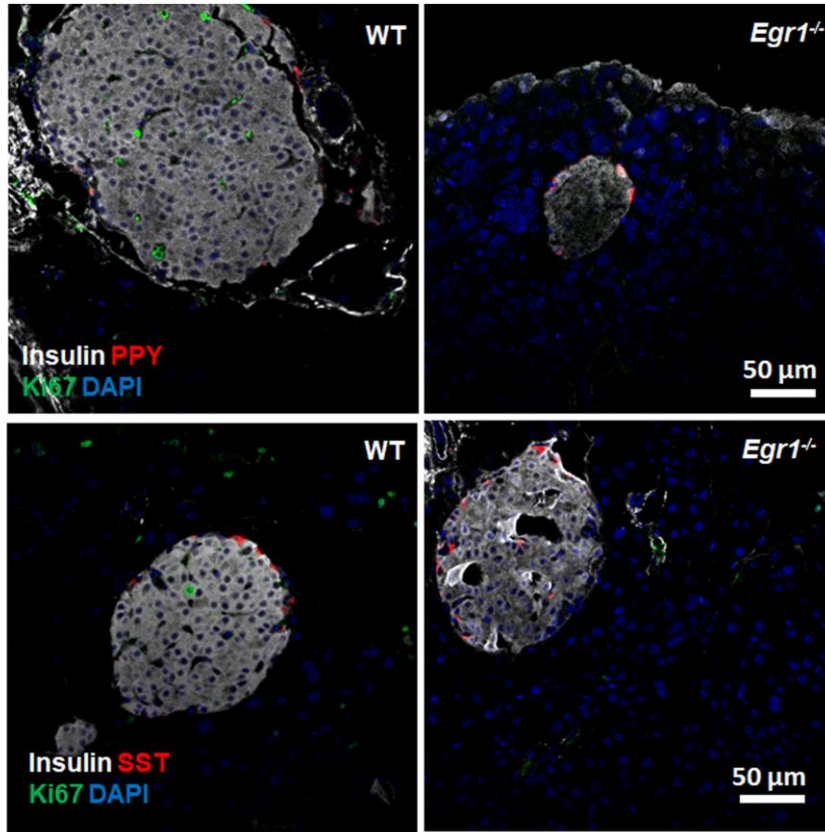

Figure S5. Ki67-positive PP- and  $\delta$ -cells were not observed in HF-fed *Egr1*<sup>-/-</sup> mice. Immunofluorescence staining for Ki67 (green) with PPY or SST (red) and insulin (white) in the pancreas of 5-month-old male mice fed a HF diet for 3 months. Scale bar: 50  $\mu$ m.



**Figure S6**

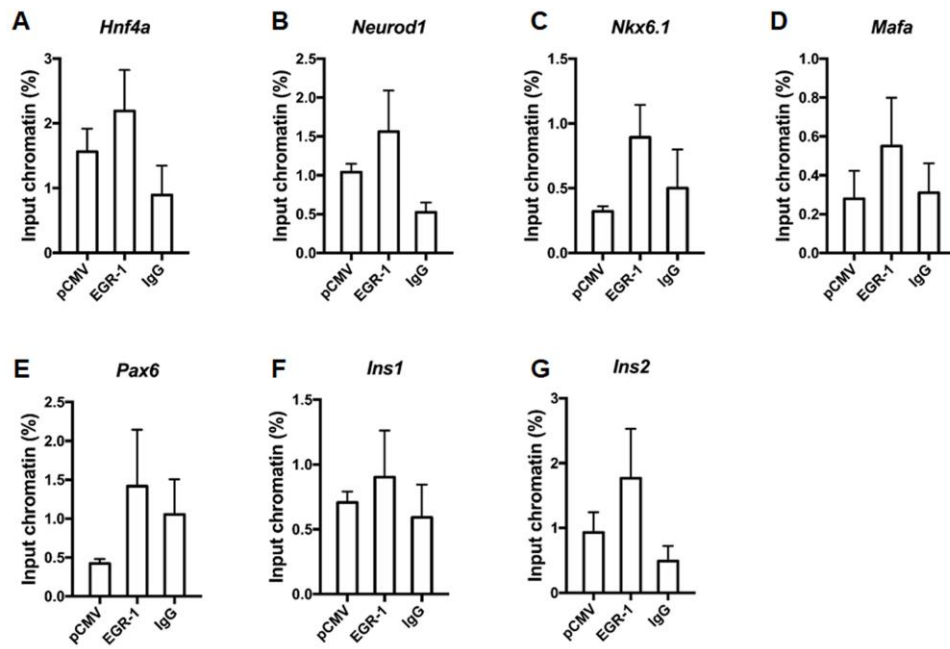

Figure S6. Chromatin immunoprecipitation assay in EGR-1 overexpressed and control (pCMV) MIN6 cells. Sequences containing the EGR-1 binding sites in potential target genes were amplified by real-time polymerase chain reaction.  $n=3$  in each group.



## Figure S7

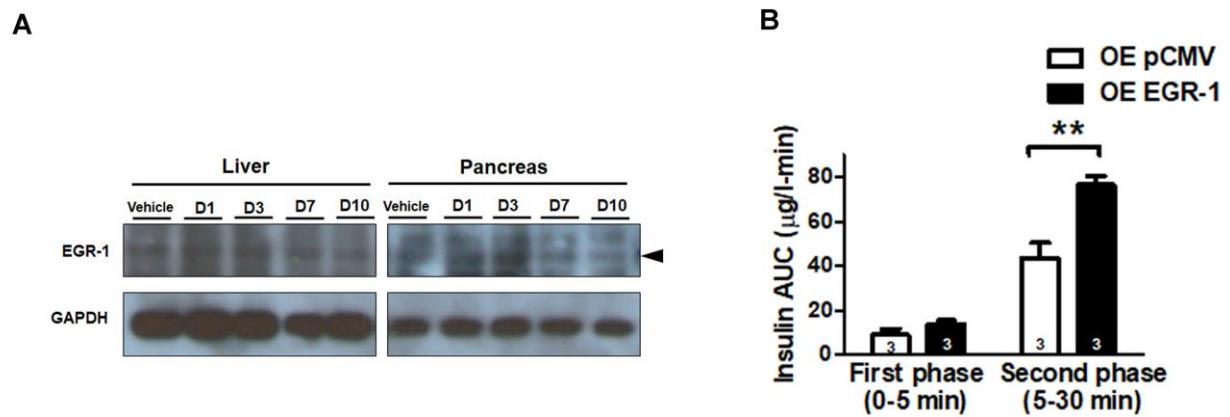

Figure S7. Overexpression of EGR-1 in mice. **A:** Immunoblot analysis on EGR-1 protein in WT mice received a single dose of EGR-1 plasmid (10 µg pCMV-EGR-1 plasmid/1.6 ml saline/mouse). The animals were euthanized at days 0, 1, 3, 7, or 10 after plasmid administration. Liver and pancreas tissues were analyzed for EGR-1 protein. **B:** *In vivo* glucose-stimulated insulin secretion (GSIS) in HF-fed WT mice received EGR-1 plasmid or empty vector pCMV (35 µg plasmid/1.6 ml saline/mouse) after oral challenge of glucose (4 g/kg body weight). Acute *in vivo* insulin secretion assay was performed at day 3 after plasmid administration. \*\* $P < 0.01$ .

**Figure S8**

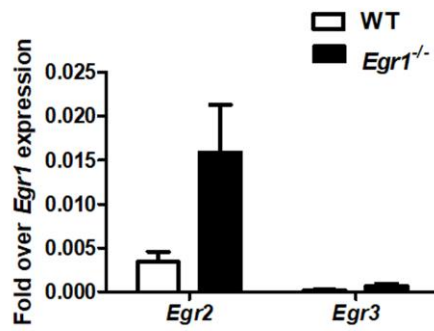

Figure S8. mRNA levels of EGR-2 and EGR-3 in the isolated islets of HF-fed *Egr1*<sup>-/-</sup> ( $n=9$ ) and WT ( $n=5$ ) mice. mRNA levels are expressed relative to the average expression of EGR-1 in WT mice.

**Table S1. Sequences of primers used for real-time PCR.**

| <b>Gene</b>    |         | <b>Sequence</b>            | <b>Amplicon</b> |
|----------------|---------|----------------------------|-----------------|
| <i>Egr1</i>    | Forward | GAACAACCCTATGAGCACCTGAC    | 101 bp          |
|                | Reverse | CGAGTCGTTTGGCTGGGATA       |                 |
| <i>Ins1</i>    | Forward | TATAAAGCTGGTGGGCATCC       | 186 bp          |
|                | Reverse | GGGACCACAAAGATGCTGTT       |                 |
| <i>Ins2</i>    | Forward | TTTGTCAAGCAGCACCTTTG       | 316 bp          |
|                | Reverse | GGTCTGAAGGTCACCTGCTC       |                 |
| <i>Hnf1b</i>   | Forward | CCCAGCAATCTCAGAACCTC       | 118 bp          |
|                | Reverse | AGGCTGCTAGCCACACTGTT       |                 |
| <i>Hnf1a</i>   | Forward | ACCACTGCATCCCTCCTATCA      | 129 bp          |
|                | Reverse | ACCTCAGGCTTGTGGCTGTAT      |                 |
| <i>Hnf3b</i>   | Forward | TCCGACTGGAGCAGCTACTAC      | 366 bp          |
|                | Reverse | GCGCCACATAGGATGACA         |                 |
| <i>Hnf4a</i>   | Forward | GTTTAGCCGACAATGTGTGG       | 114 bp          |
|                | Reverse | TCCCGCTCATTTTGGACAG        |                 |
| <i>Mafa</i>    | Forward | CATCCGACTGAAACAGAAGC       | 200 bp          |
|                | Reverse | CCGCCAACTTCTCGTATTT        |                 |
| <i>Pdx1</i>    | Forward | GGATGAAATCCACCAAAGCTC      | 79 bp           |
|                | Reverse | TTGTTTTCTCGGGTTCCGC        |                 |
| <i>Nkx6.1</i>  | Forward | GGACCAGAGAGAGCACGC         | 212 bp          |
|                | Reverse | TTCGGGTCCAGAGTTTG          |                 |
| <i>Gck</i>     | Forward | GCACACGTGGTGCTTTTGAG       | 66 bp           |
|                | Reverse | GCCTTCGGTCCCCAGAGT         |                 |
| <i>Mafb</i>    | Forward | CCACCTCTTGCTACGTGTGA       | 199 bp          |
|                | Reverse | ACTGTACAACGGAAGGGACTTG     |                 |
| <i>Pax6</i>    | Forward | GCACATGCAAACACACATGA       | 96 bp           |
|                | Reverse | ACTTGGACGGGAACTGACAC       |                 |
| <i>Pax4</i>    | Forward | TCCTGTGGCTTCCTCCTCATA      | 129 bp          |
|                | Reverse | GAGGCCTCTTATGGCCAGTTT      |                 |
| <i>Neurod1</i> | Forward | AGGAATTCGCCACGCAGAAG       | 244 bp          |
|                | Reverse | CTCCTCTGCATTCATGGCTTCAAG   |                 |
| <i>Neurog3</i> | Forward | GAGTTGGCACTCAGCAAACA       | 193 bp          |
|                | Reverse | TCTGAGTCAGTGCCCAGATG       |                 |
| <i>Gcg</i>     | Forward | ACCTGGACTCCCGCCGTGCCCA     | 197 bp          |
|                | Reverse | TCGCCTTCCTCGGCCTTTCACCAGCC |                 |
| <i>Arx</i>     | Forward | GTTACCGCTTGTCTGAGC         | 232 bp          |
|                | Reverse | GGCTCCCAGAAGCCTCATTT       |                 |
| <i>Sst</i>     | Forward | AGGACCTGCGACTAGACTGA       | 161 bp          |
|                | Reverse | GAAACTGACGGAGTCTGGGG       |                 |

|               |         |                          |        |
|---------------|---------|--------------------------|--------|
| <i>Ppy</i>    | Forward | TAGCTCAGCACACAGGATGG     | 203 bp |
|               | Reverse | GCCTGGTCAGTGTGTTGATG     |        |
| <i>Nkx2.2</i> | Forward | ACAACCCCTACACTCGCTG      | 214 bp |
|               | Reverse | TAGGTCTGCGCTTTGGAGAAG    |        |
| <i>Glut2</i>  | Forward | GTCCAGAAAGCCCCAGATACC    | 94 bp  |
|               | Reverse | GTGACATCCTCAGTTCCTCTTAG  |        |
| <i>Gck</i>    | Forward | GCACACGTGGTGCTTTTGAG     | 66 bp  |
|               | Reverse | GCCTTCGGTCCCCAGAGT       |        |
| <i>Kcnj11</i> | Forward | GCTGCATCTTCATGAAAACG     | 298 bp |
|               | Reverse | TTGGAGTCGATGACGTGGTA     |        |
| <i>Abcc8</i>  | Forward | GGAAGGACTCACCACCATC      | 247 bp |
|               | Reverse | GAGACCATCAAGGCGTAGG      |        |
| <i>Pcna</i>   | Forward | TAAAGAAGAGGAGGCGGTAA     | 175 bp |
|               | Reverse | TAAGTGTCCCATGTCAGCAA     |        |
| <i>Cdk1</i>   | Forward | GGACCTCAAGAAGTACCTGGAC   | 90 bp  |
|               | Reverse | CCCTGGAGGATTTGGTGTAAAG   |        |
| <i>Ccna2</i>  | Forward | AGCAATGTTTTTGGGAGAAC     | 156 bp |
|               | Reverse | AGGGTATATCCAGTCTGTTG     |        |
| <i>Ccnd1</i>  | Forward | GCTGCAAATGGAAGTCTTC      | 191 bp |
|               | Reverse | AGGGTGGGTTGAAATGAAC      |        |
| <i>Mki67</i>  | Forward | GCAGGTTAGCACTGTTATGAAAAC | 115 bp |
|               | Reverse | GGGCCTTGGCTGTTTTACATT    |        |
| <i>Cdk5r1</i> | Forward | GCCCTTCCTGGTAGAGAGCTG    | 113 bp |
|               | Reverse | GTGTGAAATAGTGTGGGTCGGC   |        |
| <i>Egr2</i>   | Forward | TCAGTGGTTTTATGCACCAGC    | 197 bp |
|               | Reverse | GAAGCTACTCGGATACGGGAG    |        |
| <i>Egr3</i>   | Forward | GTAGCCCATTACAATCAGATGGC  | 58 bp  |
|               | Reverse | CGTTGGTCAGACCGATGTCC     |        |
| <i>PDX1</i>   | Forward | ATGAAGTCTACCAAAGCTCACG   | 208 bp |
|               | Reverse | TGATGTGTCTCTCGGTCAAGTT   |        |
| <i>CCND1</i>  | Forward | GAAGATCGTCGCCACCTG       | 61 bp  |
|               | Reverse | GACCTCCTCCTCGCACTTCT     |        |
| <i>INS</i>    | Forward | CCTTTGTGAACCAACACCTG     | 223 bp |
|               | Reverse | CTGGTACAGCATTGTTCCAC     |        |
| <i>GCK</i>    | Forward | CATCTCTGAGTGCATCTCCGACT  | 253 bp |
|               | Reverse | CGTGGCCACCGTGTCAATC      |        |
| <i>EGR1</i>   | Forward | GCAGCAGCAGCACCTTCAA      | 112 bp |
|               | Reverse | GGTAACTGGTCTCCACCAGCAC   |        |

---

**Table S2. Sequences of primers used for CHIP-PCR.**

| Gene           | Sequence                    | Amplicon | Predicted binding site <sup>1</sup> | Other gene <sup>2</sup> |
|----------------|-----------------------------|----------|-------------------------------------|-------------------------|
| <i>Pdx1</i>    | F TGGCCACTAGGTAGATTATCTGTG  | 155 bp   | -1697                               | 0                       |
|                | R TGCCTCAATGAGTCCATTGTTTCAG |          |                                     |                         |
| <i>Arx</i>     | F GCGTGCCAGCTGCTAATC        | 150 bp   | -8                                  | 0                       |
|                | R GTCTCTCTGCTCCACGTGCT      |          |                                     |                         |
| <i>Hnf4a</i>   | F GGGAAAGGGTGTACACAATGA     | 173 bp   | 26487 (intron 1)                    | 0                       |
|                | R AAGAGGCCTTCGAGGAGAAA      |          |                                     |                         |
| <i>Neurod1</i> | F GAACCACGTGACCTGCCTAT      | 105 bp   | -263                                | 0                       |
|                | R GTCCGCGGAGTCTCTAACTG      |          |                                     |                         |
| <i>Nkx6.1</i>  | F GGGGACAGAGCACAAACG        | 177 bp   | 67 (exon 1)                         | 0                       |
|                | R TCCTTTTCGATCCGGCTAGT      |          |                                     |                         |
| <i>Mafa</i>    | F CGCCCTCATTTGCCTATC        | 173 bp   | -478                                | 0                       |
|                | R GAATCTGCCACTTGGTCTCG      |          |                                     |                         |
| <i>Pax6</i>    | F GAACCTAAGGACAGGCTACGG     | 154 bp   | -222                                | 0                       |
|                | R CTCCCTGAGGTTCGGCTTA       |          |                                     |                         |
| <i>Ins1</i>    | F AGCAGGGCTTCTTACCCATT      | 189 bp   | -1121518                            | 0                       |
|                | R GGGTATAGGGGCGAAAGACT      |          |                                     |                         |
| <i>Ins2</i>    | F AAGCTGTGGCTACCCTACCA      | 171 bp   | 161 (exon 2)                        | 0                       |
|                | R GCATCTGCTCCCTCTACCAG      |          |                                     |                         |

\*F, forward; R, reverse.

<sup>1</sup>Location of predicted EGR-1 binding region for primer design.

<sup>2</sup>Number of other genes between predicted EGR-1 binding region and target gene.
